# Supplementary material for: PTH 1-34 (teriparatide) may not improve healing in proximal humerus fractures: A randomized, controlled study of 40 patients
Source: PubMed Central journal article supplement — Acta Orthop. 2015 Sep 25;87(1):79–82. doi: 10.3109/17453674.2015.1073050 (PMC4940597; doi:10.3109/17453674.2015.1073050), 2015-09-25
Supplement: IORT_A_1073050_SM8041.pdf [file IORT_A_1073050_SM8041.pdf]

## Supplementary article data

# PTH 1-34 (teriparatide) may not improve healing in proximal humerus fractures

## A randomized, controlled study of 40 patients

Torsten JOHANSSON

Division of Orthopaedics, Department of Clinical and Experimental Medicine, Faculty of Health Sciences, Linköping University, Sweden.

Correspondence: torsten.johansson@regionostergotland.se

Submitted 2015-01-14. Accepted 2015-06-20.

Table 3. The numbers of patients in each group who were free of pain before fracture and during follow-up

| Group            | Before fracture |          | 7 weeks |          | 3 months |          |
|------------------|-----------------|----------|---------|----------|----------|----------|
|                  | rest            | activity | rest    | activity | rest     | activity |
| PTH (n = 19)     | 18              | 17       | 9       | 1        | 15       | 3        |
| Control (n = 20) | 18              | 16       | 8       | 1        | 15       | 1        |

Table 4. DASH scores before fracture and during follow-up (Mann-Whitney U-test). Median (range)

|               | Before fracture | 7 weeks    | 3 months  |
|---------------|-----------------|------------|-----------|
| Control group | 6 (0–28)        | 42 (0–80)  | 22 (0–59) |
| PTH group     | 0 (0–12)        | 28 (10–72) | 11 (3–50) |
| p-value       | 0.05            | 0.2        | 0.4       |
